# Supplementary material for: Antarctic Soil Metabolomics: A Pilot Study
Source: MDPI journal article supplement (doi:10.3390/ijms241512340), 2023-08-02

# ANTARCTIC SOIL METABOLOMICS: A PILOT STUDY

Carlotta Ciaramelli 1,†, Alessandro Palmioli 1,†, Maura Brioschi 1, Simona Viglio 2, Maura D’Amato 2,  
Paolo Iadarola 3, Solveig Tosi 4, Laura Zucconi 5 and Cristina Airol di 1,\*

1. Department of Biotechnology and Biosciences, University of Milano—Bicocca, P.zza della Scienza 2, 20126 Milano, Italy.

2. Biochemistry Unit, Department of Molecular Medicine, University of Pavia, Via Forlanini 6, 27100 Pavia, Italy.

3 Department of Biology and Biotechnologies “L. Spallanzani”, University of Pavia, Via Adolfo Ferrata 9, 27100 Pavia, Italy.

4 Department of Earth and Environmental Sciences, University of Pavia, via S. Epifanio 14, 27100 Pavia, Italy.

5 Department of Ecological and Biological Sciences, University of Tuscia, Largo dell’Università snc, 01100 Viterbo, Italy.

\* Correspondence: cristina.airol di@unimib.it; Tel.: +39-0264483303

† These authors contributed equally to this work.

## Supplementary Materials

### Table of contents

|                                              |            |
|----------------------------------------------|------------|
| <b>Table S1</b>                              | p. S2      |
| <b>Table S2</b>                              | p. S3-S5   |
| <b>Figure S1</b>                             | p. S6      |
| <b>Figure S2</b>                             | p. S7      |
| <b>Figure S3.</b>                            | p. S8      |
| <b>Figure S3</b>                             | p. S9      |
| <b>MS/MS spectra of identified compounds</b> | p. S10-S17 |

**Table S1.** Physicochemical parameters of the Antarctic soils analysed in this study (data extracted from [21] - Severgnini, M.; Canini, F.; Consolandi, C.; Camboni, T.; Paolo D'Acqui, L.; Mascalchi, C.; Ventura, S.; Zucconi, L. Highly Differentiated Soil Bacterial Communities in Victoria Land Macro-Areas (Antarctica). *FEMS Microbiol. Ecol.* **2021**, 97, fiab087. <https://doi.org/10.1093/femsec/fiab087>).

|                 | N %    | C%    | C/N ratio | pH    | Na (cmol/kg) | K (cmol/kg) | Mg (cmol/kg) | Ca (cmol/kg) | CEC (cmol/kg) | Soil Moisture % | Sand % | Coarse silt % | Fine silt % | Clay % |
|-----------------|--------|-------|-----------|-------|--------------|-------------|--------------|--------------|---------------|-----------------|--------|---------------|-------------|--------|
| <b>Ap.I 1</b>   | 0.202  | 5.87  | 29.1      | 7.76  | 0.06         | 0.14        | 0.4          | 0.25         | 0.85          | 0.595           | 74.1   | 12.3          | 12.9        | 0.7    |
| <b>Ap.I 2</b>   | 0.243  | 6.31  | 26        |       |              |             |              |              |               |                 |        |               |             |        |
| <b>B.By 1</b>   | 0.085  | 2.07  | 24.4      | 8.32  | 0.07         | 0.33        | 1.44         | 2.43         | 3.93          | 0.71            | 70.4   | 4.1           | 18.4        | 7.2    |
| <b>B.By 2</b>   | 0.035  | 0.88  | 25.14     |       |              |             |              |              |               |                 |        |               |             |        |
| <b>Cp.K 1</b>   | 0.103  | 0.91  | 8.8       | 7.6   | 0.14         | 0.34        | 2.18         | 1.89         | 6.42          | 0.432           | 93.7   | 2.5           | 3           | 0.8    |
| <b>Cp.K 2</b>   | 0.066  | 1.87  | 28.33     |       |              |             |              |              |               | 0.35            |        |               |             |        |
| <b>Ed.P 2</b>   | 0.028  | 0.565 | 2.54      | 6.595 | 0.42         | 0.29        | 0.22         | 0.37         | 1.29          | 0.176           | 81     | 8.6           | 9.6         | 0.9    |
| <b>Ed.P 3</b>   | 0.004  | 0.05  | 12.5      | 6.61  | 0.78         | 0.47        | 0.2          | 0.41         | 1.85          | 0.18            | 95.8   | 3.3           | 0.8         | 0.2    |
| <b>Ed.P 4</b>   | 0.009  | 0.03  | 3.3       | 6.79  | 0.37         | 0.45        | 0.24         | 0.01         | 1.07          | 0.18            | 97.8   | 1.8           | 0.2         |        |
| <b>Ky.I 1</b>   | 0.209  | 6.37  | 30.5      | 7.3   | 0.55         | 0.42        | 0.69         | 0.54         | 4.91          | 14.2            | 75.4   | 12.2          | 11.7        | 0.7    |
| <b>Ky.I 2</b>   | 0.227  | 6.44  | 28.4      |       |              |             |              |              |               |                 |        |               |             |        |
| <b>Pr.I 1</b>   | 1.093  | 9.04  | 8.27      | 7.1   | 0.87         | 0.22        | 1.87         | 2.75         | 0.17          | 1.81            | 49.92  | 19            | 28.15       | 2.94   |
| <b>Pr.I 2</b>   | 0.868  | 6.62  | 7.63      |       |              |             |              |              |               | 0.99            |        |               |             |        |
| <b>Lk.F 1.1</b> | 0.019  | 0.33  | 17.4      | 7.81  | 2.12         | 0.45        | 1.15         | 2.06         | 3.53          | 0.18            | 87.2   | 3.2           | 6.3         | 3.3    |
| <b>Lk.F 1.2</b> | 0.01   | 0.03  | 3         |       |              |             |              |              |               | 0.473           |        |               |             |        |
| <b>Lk.F 1.3</b> | 0.009  | 0.05  | 5.6       |       |              |             |              |              |               | 0.181           |        |               |             |        |
| <b>Lk.H 1.1</b> | 0.008  | 0.11  | 13.8      | 7.98  | 0.07         | 0.36        | 0.88         | 0.84         | 2.16          | 0.088           | 93.4   | 2.7           | 3           | 1      |
| <b>Lk.H 1.2</b> | 0.0125 | 0.135 | 10.8      |       |              |             |              |              |               | 0.0895          |        |               |             |        |
| <b>Lk.J 1.1</b> | 0.019  | 0.02  | 1.1       | 6.8   | 8.32         | 0.4         | 1.5          | 0.75         | 10.97         | 0.178           | 87.9   | 1.3           | 5.5         | 5.4    |
| <b>Lk.J 1.2</b> | 0.005  | 0.144 | 31.7      | 6.56  | 1.59         | 0.84        | 2.23         | 1.39         | 6.05          | 0.348           | 90.2   | 0.6           | 4.4         | 4.8    |

**Table S2.** Peak picking (chemical shift - ppm) and the corresponding peak intensities from <sup>1</sup>H-NMR spectra of extracts of Antarctic soils (Edmonson Point site 2) obtained by different extraction solvents: **A)** DMSO; **B)** H<sub>2</sub>O/MeOH (1:1), and **C)** H<sub>2</sub>O/MeCN (7:3). Samples were dissolved at final concentration of 15mg/mL in d<sub>6</sub>-DMSO (**A**) and in 10 mM phosphate buffer (PB) in D<sub>2</sub>O, pH 7.2 (**B** and **C**), with 0.5 mM TSP.

| <b>A) Extract in DMSO</b> |            |                  |    |            |                  |
|---------------------------|------------|------------------|----|------------|------------------|
|                           | <b>ppm</b> | <b>Intensity</b> |    | <b>ppm</b> | <b>Intensity</b> |
| 1                         | 11.20      | 9587.7           | 21 | 2.61       | 66108.2          |
| 2                         | 11.16      | 22425.4          | 22 | 2.57       | 11003.8          |
| 3                         | 10.10      | 34779.8          | 23 | 2.55       | 3613277.1        |
| 4                         | 9.21       | 13846.3          | 24 | 2.55       | 3445335.7        |
| 5                         | 5.33       | 26736.5          | 25 | 2.51       | 1019956.1        |
| 6                         | 5.18       | 14800.4          | 26 | 2.51       | 1049092.7        |
| 7                         | 4.91       | 13703.4          | 27 | 2.43       | 26964.4          |
| 8                         | 4.52       | 404886.9         | 28 | 2.39       | 18667.1          |
| 9                         | 4.50       | 337998.6         | 29 | 2.34       | 78714.4          |
| 10                        | 3.83       | 38107.4          | 30 | 2.34       | 76497.7          |
| 11                        | 3.78       | 25219.8          | 31 | 2.02       | 29817.8          |
| 12                        | 3.65       | 38621.7          | 32 | 1.97       | 24769.5          |
| 13                        | 3.58       | 69298.2          | 33 | 1.46       | 18511.3          |
| 14                        | 3.43       | 12643241.2       | 34 | 1.23       | 201231.9         |
| 15                        | 3.25       | 67249.5          | 35 | 0.85       | 54955.9          |
| 16                        | 3.11       | 42179.0          | 36 | 0.84       | 35204.9          |
| 17                        | 2.99       | 19740.2          | 37 | -0.02      | 108957.9         |
| 18                        | 2.95       | 18507.1          | 38 | -0.02      | 107391.9         |
| 19                        | 2.89       | 15705.1          | 39 | -0.07      | 50811.7          |
| 20                        | 2.66       | 18724.4          |    |            |                  |

  

| <b>B) Extract in H<sub>2</sub>O/MeOH (1:1)</b> |            |                  |    |            |                  |    |            |                  |     |            |                  |
|------------------------------------------------|------------|------------------|----|------------|------------------|----|------------|------------------|-----|------------|------------------|
|                                                | <b>ppm</b> | <b>Intensity</b> |    | <b>ppm</b> | <b>Intensity</b> |    | <b>ppm</b> | <b>Intensity</b> |     | <b>ppm</b> | <b>Intensity</b> |
| 1                                              | 8.46       | 51440.3          | 29 | 4.08       | 101194.0         | 57 | 3.69       | 351973.5         | 85  | 3.27       | 144877.1         |
| 2                                              | 7.80       | 13443.0          | 30 | 4.07       | 124461.8         | 58 | 3.68       | 328503.4         | 86  | 3.26       | 149308.4         |
| 3                                              | 7.43       | 15530.9          | 31 | 4.04       | 451400.3         | 59 | 3.67       | 334218.6         | 87  | 3.25       | 189643.8         |
| 4                                              | 7.34       | 17883.8          | 32 | 4.02       | 464642.7         | 60 | 3.66       | 306297.0         | 88  | 3.23       | 128131.7         |
| 5                                              | 6.91       | 21447.7          | 33 | 4.00       | 425342.1         | 61 | 3.65       | 140309.7         | 89  | 3.21       | 400527.3         |
| 6                                              | 5.45       | 45882.4          | 34 | 3.97       | 148174.8         | 62 | 3.64       | 135520.7         | 90  | 3.13       | 189769.5         |
| 7                                              | 5.41       | 57631.1          | 35 | 3.95       | 192246.7         | 63 | 3.63       | 89379.3          | 91  | 3.03       | 36154.3          |
|                                                |            |                  |    |            |                  |    |            |                  | 113 | 2.05       | 53543.0          |
|                                                |            |                  |    |            |                  |    |            |                  | 114 | 1.92       | 802985.4         |
|                                                |            |                  |    |            |                  |    |            |                  | 115 | 1.91       | 66752.0          |
|                                                |            |                  |    |            |                  |    |            |                  | 116 | 1.89       | 47364.0          |
|                                                |            |                  |    |            |                  |    |            |                  | 117 | 1.55       | 63335.4          |
|                                                |            |                  |    |            |                  |    |            |                  | 118 | 1.49       | 297026.2         |
|                                                |            |                  |    |            |                  |    |            |                  | 119 | 1.48       | 294534.6         |

|    |      |          |    |      |          |    |      |          |     |      |          |     |       |           |
|----|------|----------|----|------|----------|----|------|----------|-----|------|----------|-----|-------|-----------|
| 8  | 5.24 | 127509.9 | 36 | 3.94 | 207773.4 | 64 | 3.61 | 156905.6 | 92  | 3.02 | 54753.1  | 120 | 1.34  | 176357.0  |
| 9  | 5.23 | 131706.3 | 37 | 3.91 | 463480.6 | 65 | 3.59 | 354193.7 | 93  | 3.01 | 39728.7  | 121 | 1.32  | 200918.7  |
| 10 | 5.20 | 25506.0  | 38 | 3.91 | 422637.0 | 66 | 3.58 | 749761.9 | 94  | 2.81 | 21289.9  | 122 | 1.07  | 43908.2   |
| 11 | 5.03 | 49254.1  | 39 | 3.89 | 526814.2 | 67 | 3.57 | 390751.7 | 95  | 2.75 | 38972.7  | 123 | 1.06  | 70115.4   |
| 12 | 5.01 | 135206.8 | 40 | 3.89 | 677901.6 | 68 | 3.56 | 575194.0 | 96  | 2.73 | 189096.5 | 124 | 1.05  | 97251.0   |
| 13 | 4.66 | 81870.4  | 41 | 3.87 | 274009.6 | 69 | 3.54 | 194066.2 | 97  | 2.68 | 42406.9  | 125 | 1.04  | 98490.3   |
| 14 | 4.64 | 86334.9  | 42 | 3.85 | 289310.7 | 70 | 3.53 | 156981.9 | 98  | 2.66 | 25348.3  | 126 | 1.02  | 67044.7   |
| 15 | 4.29 | 49350.5  | 43 | 3.84 | 449947.4 | 71 | 3.53 | 179507.5 | 99  | 2.57 | 45428.6  | 127 | 1.01  | 64003.0   |
| 16 | 4.25 | 120277.1 | 44 | 3.82 | 424697.9 | 72 | 3.51 | 168317.9 | 100 | 2.54 | 35296.2  | 128 | 1.00  | 106806.6  |
| 17 | 4.24 | 110975.3 | 45 | 3.82 | 417394.4 | 73 | 3.49 | 288549.7 | 101 | 2.41 | 164889.4 | 129 | 0.99  | 107954.4  |
| 18 | 4.23 | 66451.2  | 46 | 3.81 | 715983.1 | 74 | 3.49 | 139011.5 | 102 | 2.39 | 36461.0  | 130 | 0.98  | 108624.2  |
| 19 | 4.22 | 68372.1  | 47 | 3.79 | 675202.1 | 75 | 3.48 | 232084.4 | 103 | 2.37 | 72169.0  | 131 | 0.97  | 172951.0  |
| 20 | 4.19 | 48404.4  | 48 | 3.78 | 391157.4 | 76 | 3.47 | 147863.4 | 104 | 2.36 | 71267.3  | 132 | 0.96  | 137115.7  |
| 21 | 4.17 | 69930.7  | 49 | 3.77 | 490907.1 | 77 | 3.46 | 135728.1 | 105 | 2.35 | 57081.1  | 133 | 0.94  | 97731.6   |
| 22 | 4.16 | 124680.0 | 50 | 3.76 | 498605.7 | 78 | 3.45 | 212614.2 | 106 | 2.31 | 52425.1  | 134 | 0.93  | 73225.6   |
| 23 | 4.15 | 155020.9 | 51 | 3.75 | 439533.4 | 79 | 3.44 | 190093.4 | 107 | 2.30 | 88457.7  | 135 | 0.91  | 68201.7   |
| 24 | 4.13 | 222473.2 | 52 | 3.74 | 434494.2 | 80 | 3.43 | 123390.1 | 108 | 2.29 | 60318.8  | 136 | 0.88  | 92735.8   |
| 25 | 4.13 | 170962.3 | 53 | 3.73 | 421290.7 | 81 | 3.42 | 245813.2 | 109 | 2.19 | 65053.3  | 137 | 0.07  | 134037.2  |
| 26 | 4.12 | 275922.0 | 54 | 3.72 | 925612.0 | 82 | 3.41 | 140702.8 | 110 | 2.17 | 81205.8  | 138 | -0.00 | 1438756.8 |
| 27 | 4.11 | 303613.2 | 55 | 3.71 | 345560.0 | 83 | 3.40 | 205646.8 | 111 | 2.08 | 50906.1  |     |       |           |
| 28 | 4.10 | 87891.3  | 56 | 3.70 | 835031.3 | 84 | 3.39 | 82366.6  | 112 | 2.06 | 59509.8  |     |       |           |

C) Extract in H<sub>2</sub>O/MeCN (7:3)

|    | ppm  | Intensity |     | ppm  | Intensity |     | ppm  | Intensity |
|----|------|-----------|----|------|-----------|----|------|-----------|----|------|-----------|-----|------|-----------|-----|------|-----------|
| 1  | 8.46 | 50610.4   | 29 | 4.27 | 81580.0   | 57 | 3.96 | 136573.4  | 85 | 3.67 | 384513.6  | 113 | 3.41 | 231291.4  | 141 | 2.41 | 203660.0  |
| 2  | 7.81 | 20547.2   | 30 | 4.26 | 82106.1   | 58 | 3.95 | 191953.8  | 86 | 3.67 | 277847.3  | 114 | 3.40 | 75389.3   | 142 | 2.39 | 31101.6   |
| 3  | 7.80 | 20422.3   | 31 | 4.25 | 125974.1  | 59 | 3.94 | 224191.1  | 87 | 3.66 | 340688.1  | 115 | 3.39 | 97516.4   | 143 | 2.37 | 74812.1   |
| 4  | 7.43 | 15497.9   | 32 | 4.24 | 111560.9  | 60 | 3.93 | 189906.8  | 88 | 3.65 | 154324.8  | 116 | 3.35 | 16337.6   | 144 | 2.37 | 47477.1   |
| 5  | 7.42 | 11907.9   | 33 | 4.23 | 77851.5   | 61 | 3.91 | 549630.3  | 89 | 3.64 | 128489.5  | 117 | 3.30 | 22380.5   | 145 | 2.36 | 73448.9   |
| 6  | 7.34 | 18307.5   | 34 | 4.22 | 85490.3   | 62 | 3.91 | 465256.0  | 90 | 3.63 | 92222.0   | 118 | 3.28 | 33721.2   | 146 | 2.35 | 61810.7   |
| 7  | 7.33 | 15700.5   | 35 | 4.20 | 47201.1   | 63 | 3.89 | 597411.9  | 91 | 3.61 | 170097.2  | 119 | 3.27 | 161270.5  | 147 | 2.31 | 66142.3   |
| 8  | 7.19 | 11244.9   | 36 | 4.19 | 63560.7   | 64 | 3.89 | 733553.3  | 92 | 3.59 | 369957.4  | 120 | 3.26 | 176459.5  | 148 | 2.30 | 122110.8  |
| 9  | 6.93 | 18482.9   | 37 | 4.17 | 77493.4   | 65 | 3.87 | 275825.5  | 93 | 3.58 | 895058.5  | 121 | 3.25 | 213942.4  | 149 | 2.29 | 74961.8   |
| 10 | 6.91 | 25462.6   | 38 | 4.16 | 132448.5  | 66 | 3.86 | 277907.9  | 94 | 3.57 | 432328.8  | 122 | 3.23 | 155039.5  | 150 | 2.24 | 75184.2   |
| 11 | 6.52 | 9541.9    | 39 | 4.15 | 160190.9  | 67 | 3.85 | 306933.9  | 95 | 3.56 | 674250.1  | 123 | 3.21 | 372034.2  | 151 | 2.19 | 66217.4   |

|    |      |          |    |      |          |    |      |           |     |      |          |     |      |          |     |      |           |     |       |           |
|----|------|----------|----|------|----------|----|------|-----------|-----|------|----------|-----|------|----------|-----|------|-----------|-----|-------|-----------|
| 12 | 5.91 | 9738.1   | 40 | 4.13 | 267728.6 | 68 | 3.84 | 465836.6  | 96  | 3.55 | 205203.9 | 124 | 3.19 | 21846.8  | 152 | 2.18 | 83267.5   | 180 | 1.05  | 48297.4   |
| 13 | 5.45 | 44108.1  | 41 | 4.13 | 232391.6 | 69 | 3.82 | 452169.8  | 97  | 3.55 | 205012.4 | 125 | 3.13 | 109194.0 | 153 | 2.16 | 57683.3   | 181 | 1.04  | 106006.3  |
| 14 | 5.42 | 57789.1  | 42 | 4.12 | 310111.4 | 70 | 3.82 | 435664.8  | 98  | 3.54 | 189750.8 | 126 | 3.11 | 24146.2  | 154 | 2.14 | 45863.9   | 182 | 1.02  | 71298.9   |
| 15 | 5.25 | 23676.8  | 43 | 4.11 | 345768.0 | 71 | 3.81 | 863996.1  | 99  | 3.53 | 158109.2 | 127 | 3.03 | 57632.1  | 155 | 2.13 | 43335.7   | 183 | 1.01  | 67222.6   |
| 16 | 5.24 | 153725.0 | 44 | 4.11 | 122158.4 | 72 | 3.79 | 809133.3  | 100 | 3.53 | 195127.3 | 128 | 3.02 | 75479.8  | 156 | 2.12 | 42168.0   | 184 | 1.00  | 118431.7  |
| 17 | 5.23 | 152981.2 | 45 | 4.10 | 97903.6  | 73 | 3.78 | 471955.9  | 101 | 3.51 | 197941.6 | 129 | 3.01 | 54298.3  | 157 | 2.08 | 62065.7   | 185 | 0.99  | 121299.8  |
| 18 | 5.20 | 32191.9  | 46 | 4.08 | 115918.2 | 74 | 3.77 | 552899.9  | 102 | 3.49 | 342666.7 | 130 | 2.84 | 16278.7  | 158 | 2.06 | 61584.4   | 186 | 0.98  | 116099.0  |
| 19 | 5.20 | 32220.9  | 47 | 4.07 | 135061.1 | 75 | 3.76 | 527360.1  | 103 | 3.49 | 135528.5 | 131 | 2.81 | 23136.1  | 159 | 2.05 | 53461.4   | 187 | 0.97  | 190080.3  |
| 20 | 5.04 | 50035.5  | 48 | 4.06 | 109259.5 | 76 | 3.75 | 443997.1  | 104 | 3.48 | 256794.5 | 132 | 2.80 | 23905.1  | 160 | 2.02 | 31940.8   | 188 | 0.96  | 143820.0  |
| 21 | 5.03 | 53339.3  | 49 | 4.04 | 485924.1 | 77 | 3.74 | 454134.6  | 105 | 3.47 | 141423.1 | 133 | 2.75 | 42392.8  | 161 | 2.01 | 37817.9   | 189 | 0.94  | 100433.4  |
| 22 | 5.02 | 113810.2 | 50 | 4.02 | 487871.9 | 78 | 3.73 | 444241.0  | 106 | 3.47 | 147047.2 | 134 | 2.72 | 21892.3  | 162 | 1.92 | 1223068.9 | 190 | 0.93  | 69857.4   |
| 23 | 5.01 | 146966.8 | 51 | 4.01 | 128996.2 | 79 | 3.72 | 1116757.7 | 107 | 3.47 | 146219.8 | 135 | 2.70 | 34761.0  | 163 | 1.91 | 80859.6   | 191 | 0.92  | 57219.5   |
| 24 | 4.97 | 17817.8  | 52 | 4.00 | 426655.4 | 80 | 3.71 | 376082.6  | 108 | 3.46 | 220904.7 | 136 | 2.68 | 32339.5  | 164 | 1.89 | 55852.9   | 192 | 0.91  | 54953.9   |
| 25 | 4.66 | 12541.4  | 53 | 4.00 | 460894.8 | 81 | 3.70 | 1076639.0 | 109 | 3.44 | 183741.4 | 137 | 2.67 | 25535.3  | 165 | 1.88 | 30784.3   | 193 | 0.88  | 77458.6   |
| 26 | 4.64 | 17326.3  | 54 | 4.00 | 418471.9 | 82 | 3.70 | 524108.2  | 110 | 3.43 | 132919.7 | 138 | 2.65 | 22107.6  | 166 | 1.73 | 32429.5   | 194 | -0.00 | 1125706.5 |
| 27 | 4.30 | 50839.9  | 55 | 3.98 | 123196.6 | 83 | 3.69 | 362244.0  | 111 | 3.42 | 290503.4 | 139 | 2.57 | 23195.8  | 167 | 1.72 | 31875.4   |     |       |           |
| 28 | 4.29 | 51880.6  | 56 | 3.97 | 148853.1 | 84 | 3.68 | 360650.4  | 112 | 3.41 | 148886.5 | 140 | 2.44 | 23971.8  | 168 | 1.70 | 31870.5   |     |       |           |

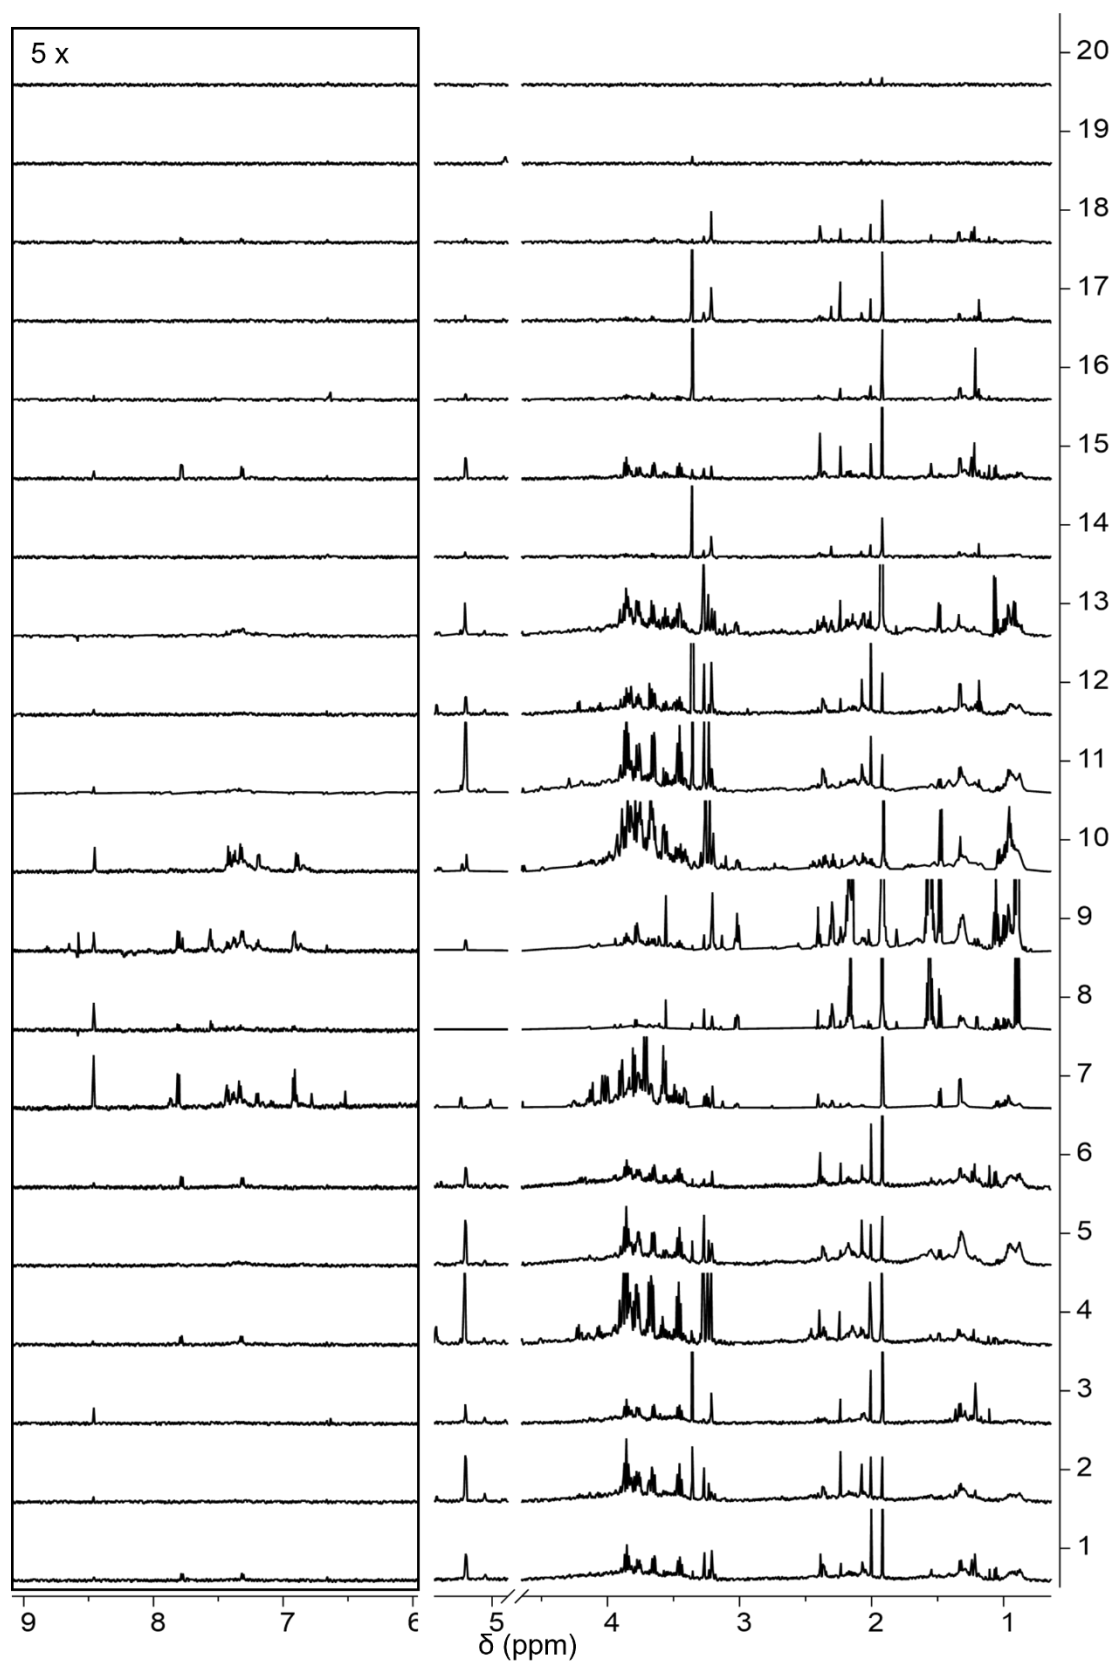

**Figure S1.**  $^1\text{H}$ -NMR spectra of extracts of Antarctic soils from different sites obtained in  $\text{H}_2\text{O}/\text{MeCN}$  (7:3). Samples are dissolved at final concentration of 15mg/mL in 10 mM PB in  $\text{D}_2\text{O}$ , pH 7.2, with 0.5 mM TSP. 1) Ap.I 1; 2) Ap.I 2; 3) B.By 1; 4) B.By 2; 5) Cp.K 1; 6) Cp.K 2; 7) Ed.P 2; 8) Ed.P 3; 9) Ed.P 4; 10) Ky.I 1; 11) Ky.I 2; 12) Pr.I 1; 13) Pr.I 2; 14) Lk.F 1.1; 15) Lk.F 1.2; 16) Lk.F 1.3; 17) Lk.H 1.1; 18) Lk.H 1.2; 19) Lk.J 1.1; 20) Lk.J 1.2.

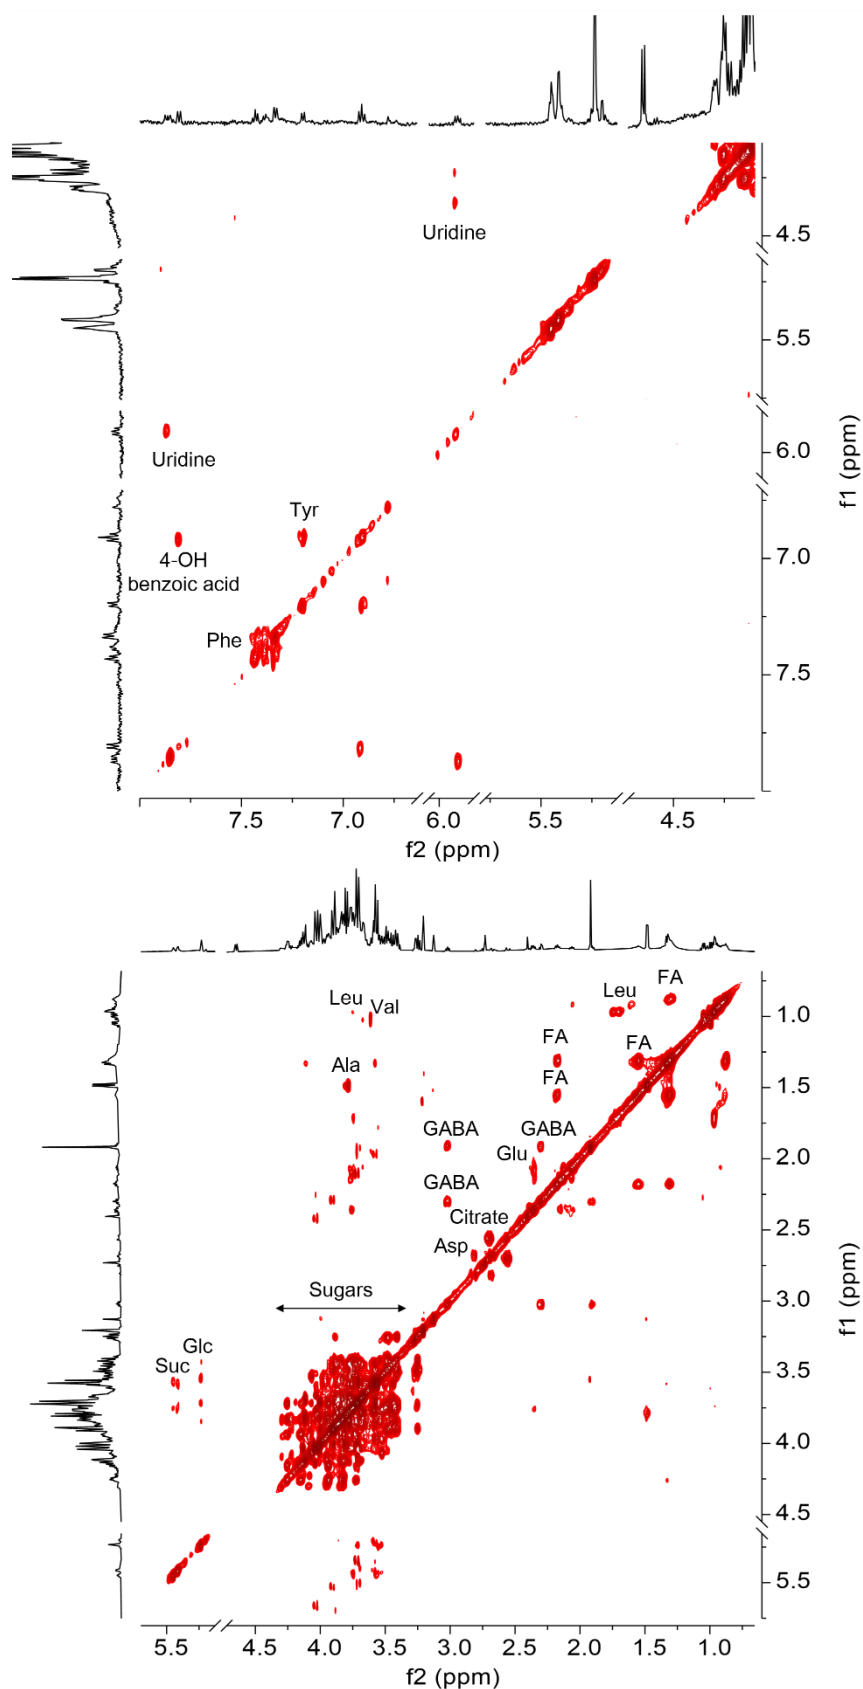

**Figure S2.** Expansions of two regions of  $^1\text{H}$ ,  $^1\text{H}$ -TOCSY spectrum of Antarctic soil extract Ed.P 2 in 10 mM PB in  $\text{D}_2\text{O}$ . The corresponding  $^1\text{H}$ -NMR spectra are reported along the axes. The resonances of some of the most important metabolites are indicated on the 2D spectra.

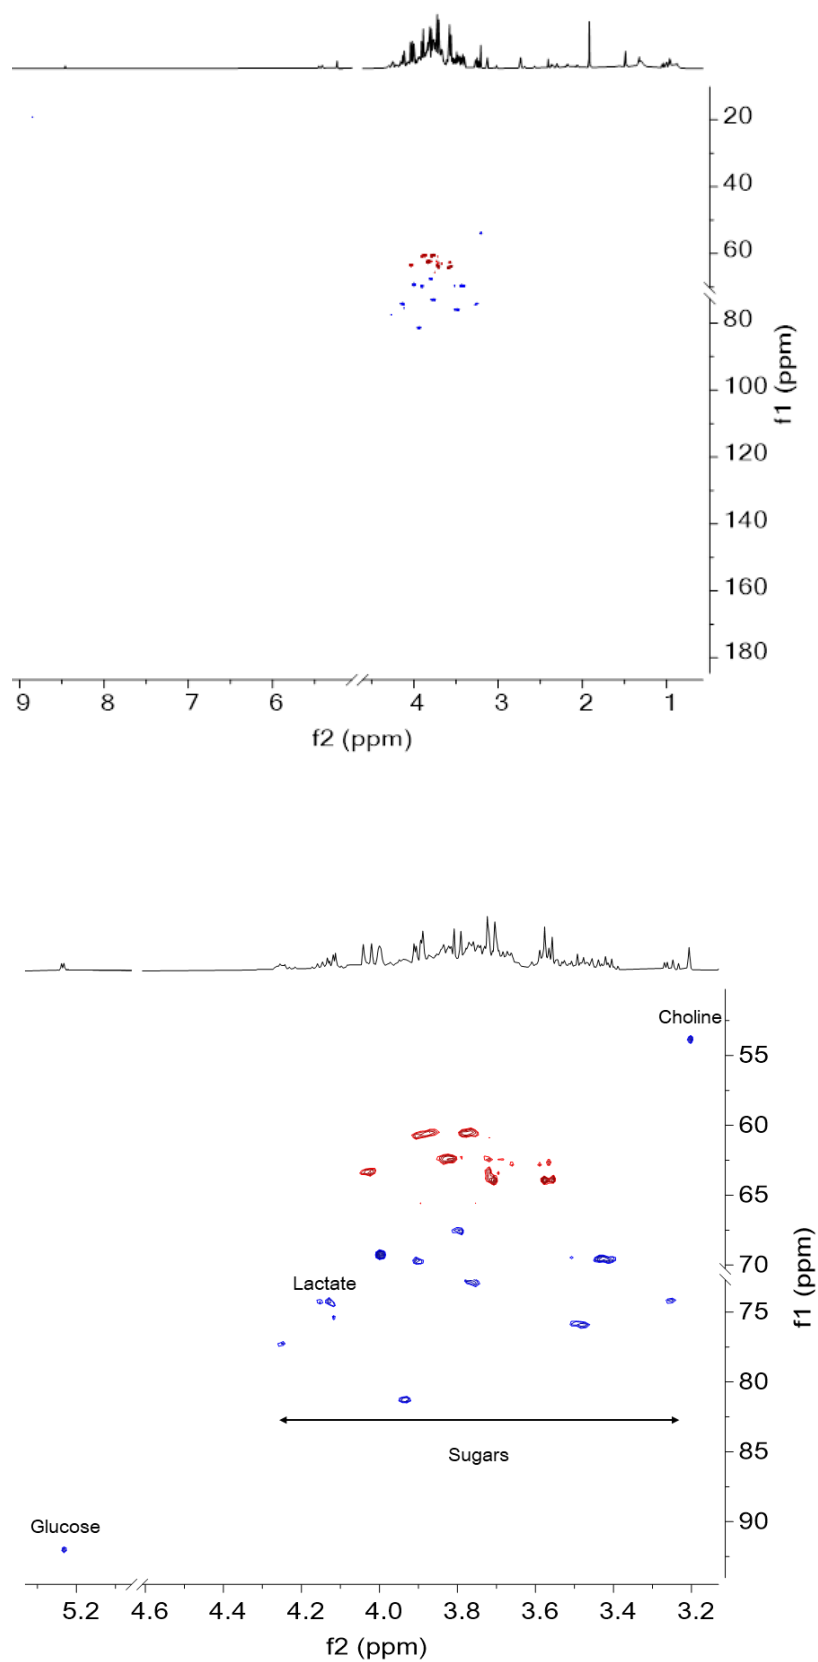

**Figure S3.**  $^1\text{H}$ ,  $^{13}\text{C}$ -HSQC spectrum of Antarctic soil extract Ed.P 2 in 10 mM PB in  $\text{D}_2\text{O}$ . The corresponding  $^1\text{H}$ -NMR spectrum is reported.



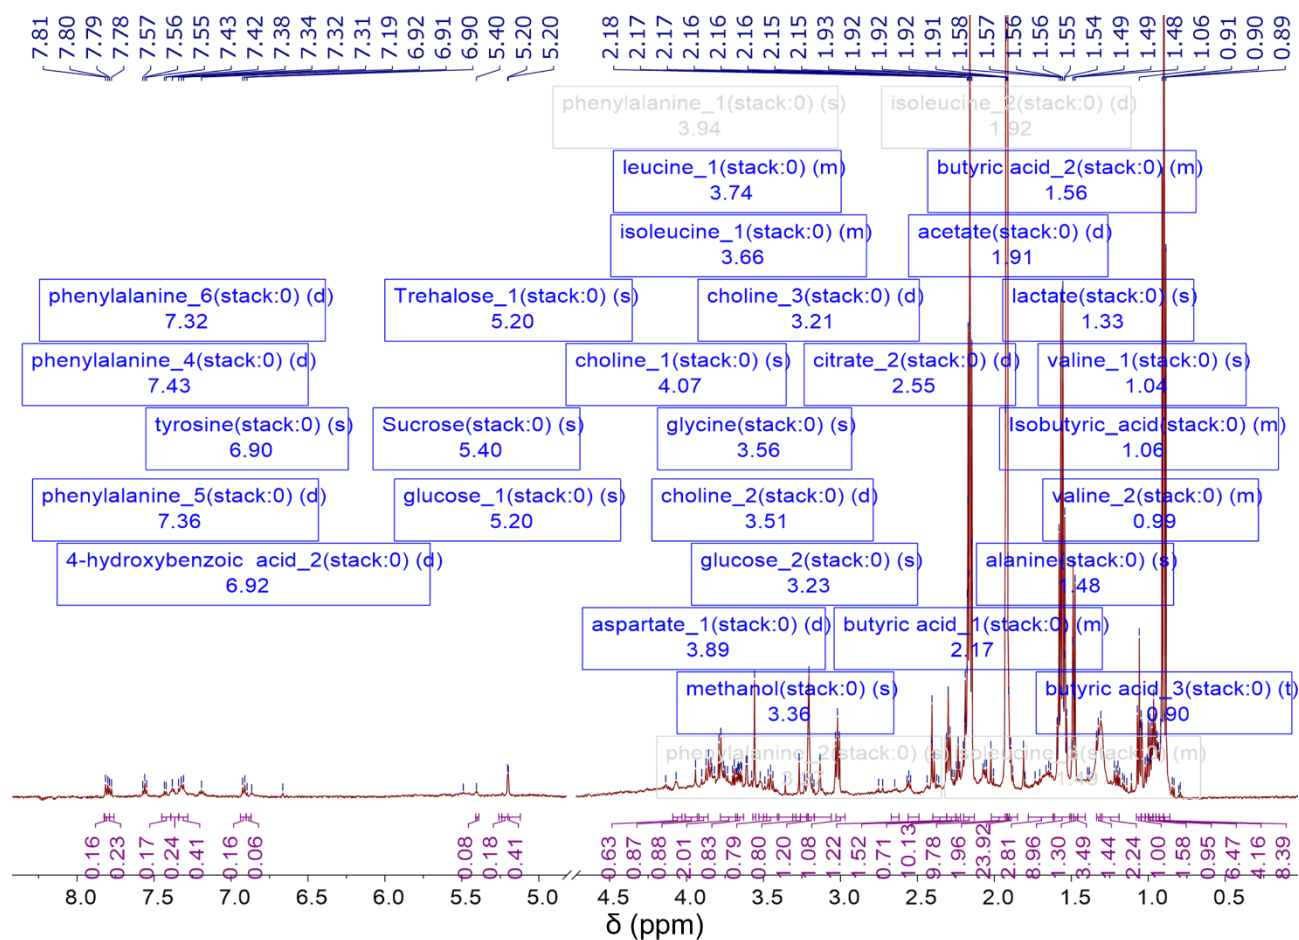

**Figure S4.** Output of SMA plug-in of MestreNova software on a spectrum of Antarctic soil extract Ed.P 4 in 10 mM PB in D<sub>2</sub>O. Labels with the name of the molecule, the chemical shift and multiplicity are automatically reported for each signal.

Experimental spectra (ES-) reported in comparison with matched reference spectra.

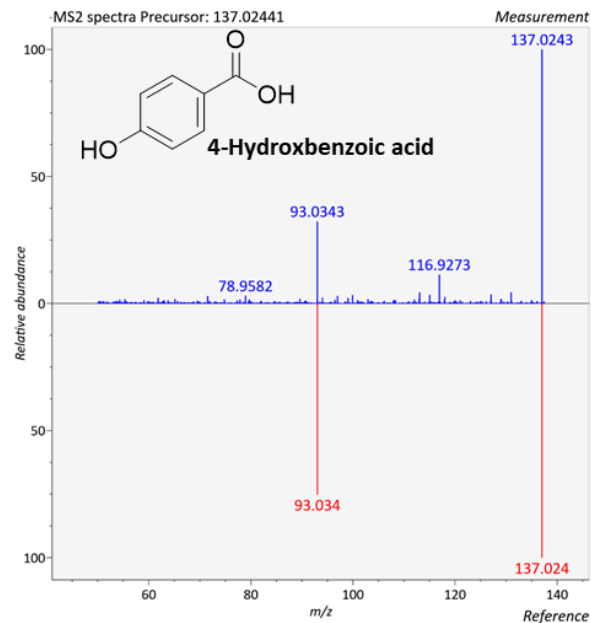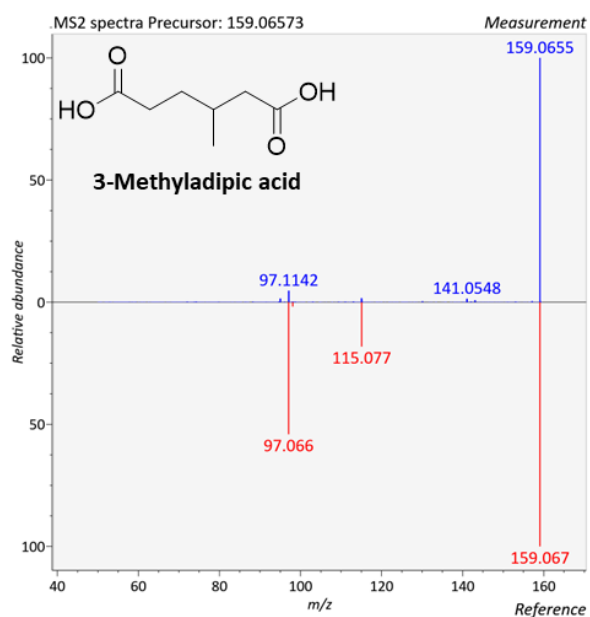

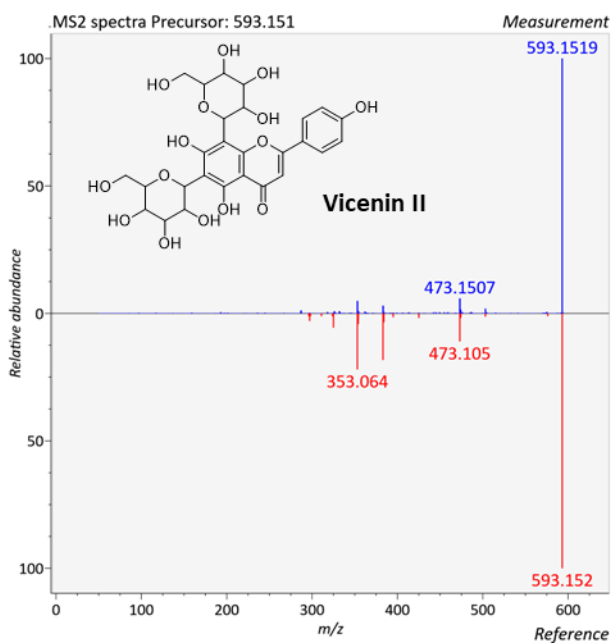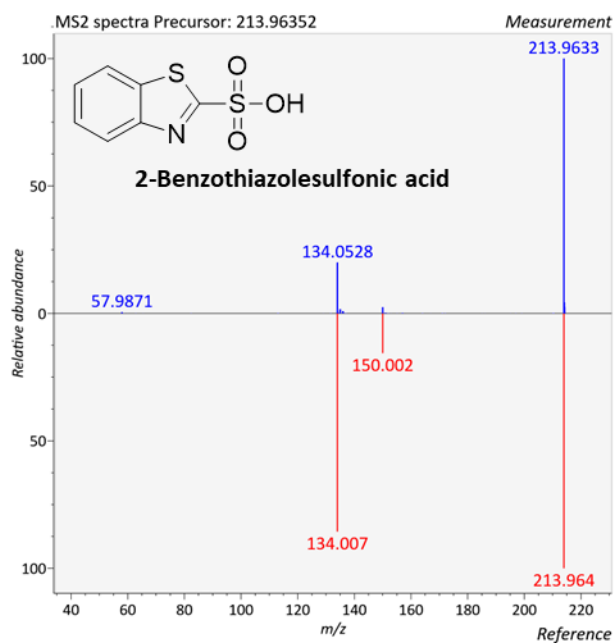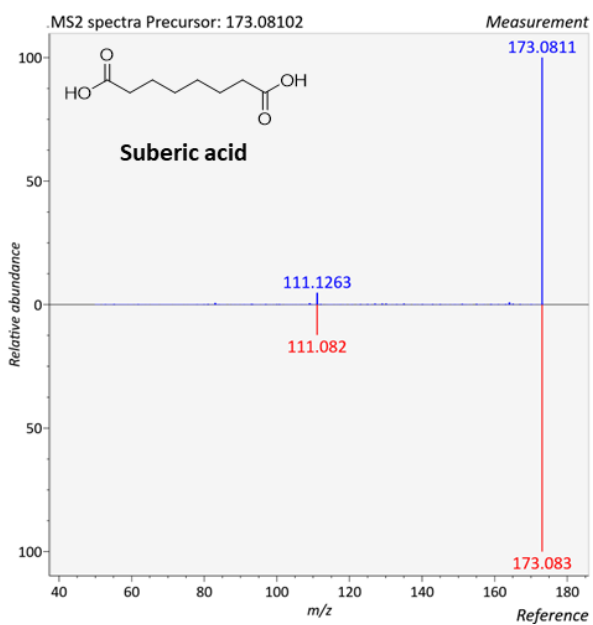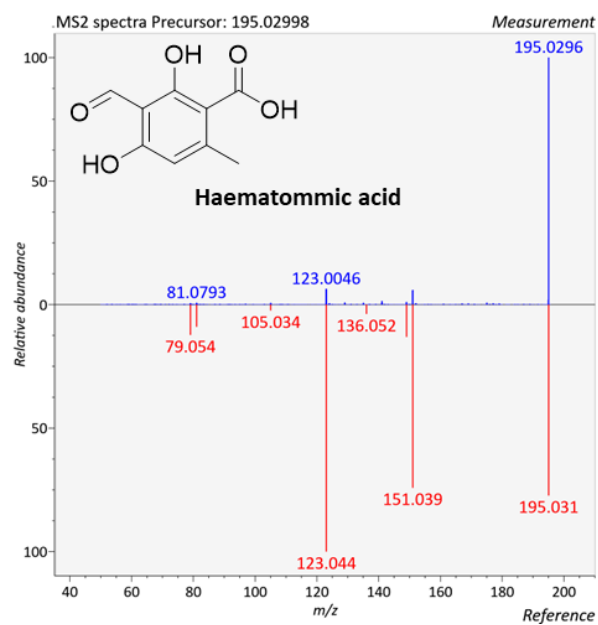

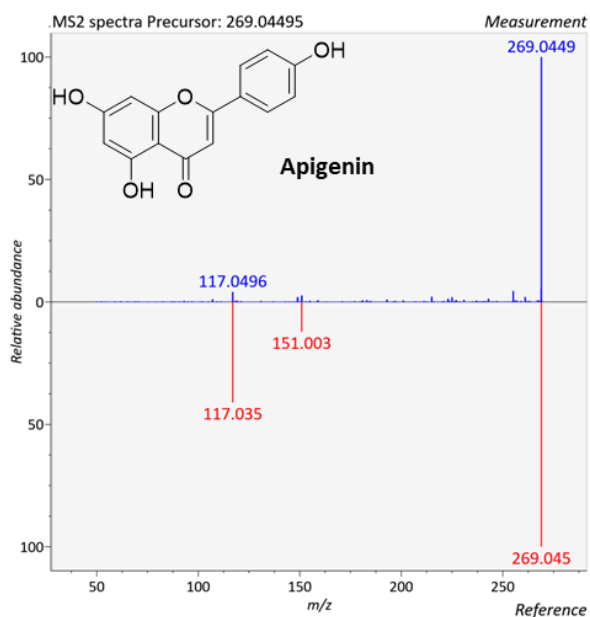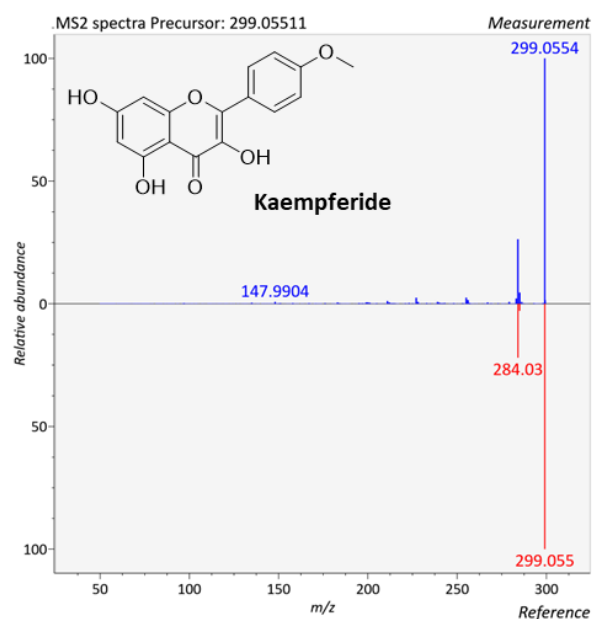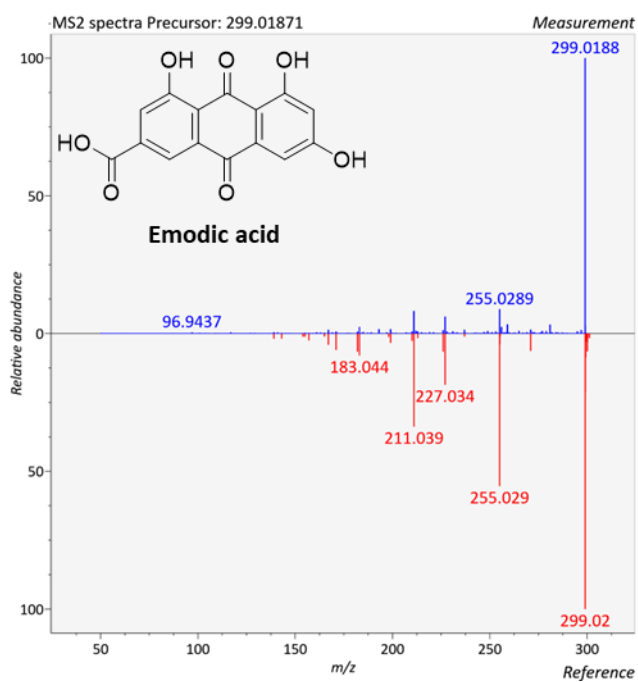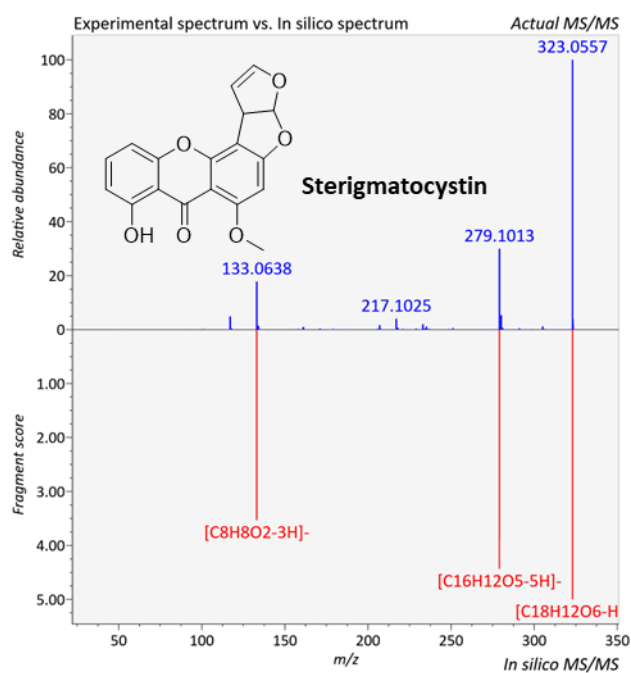

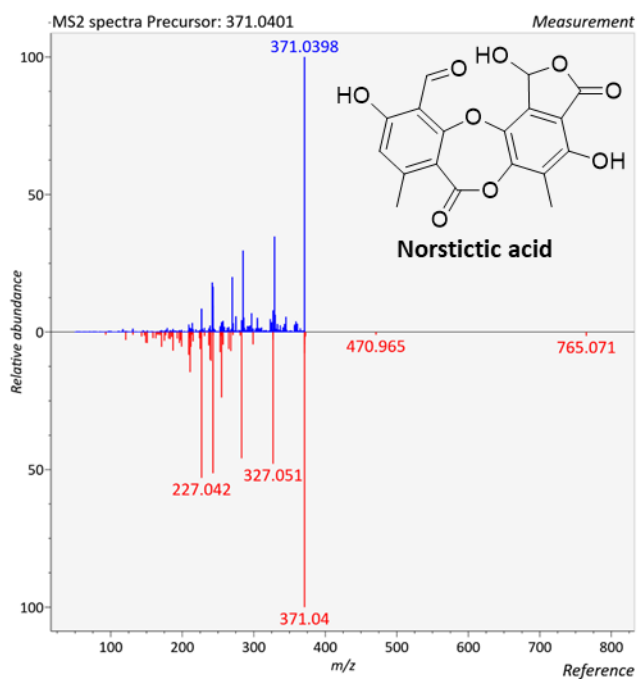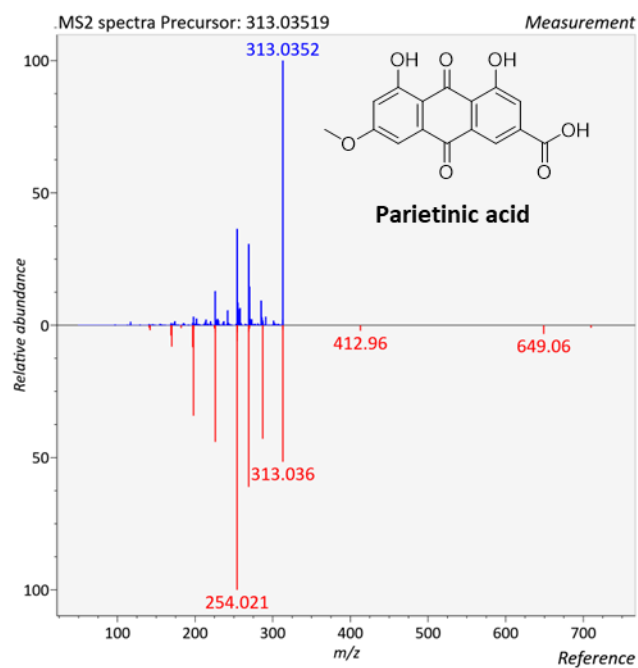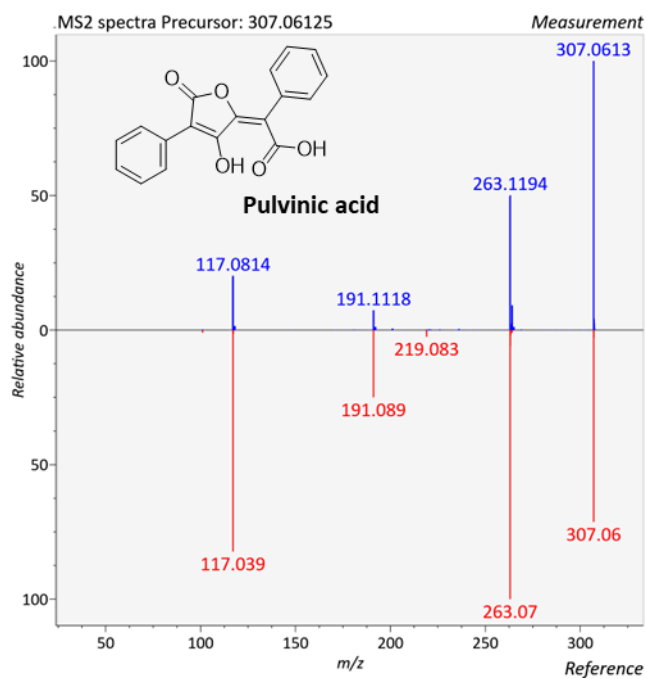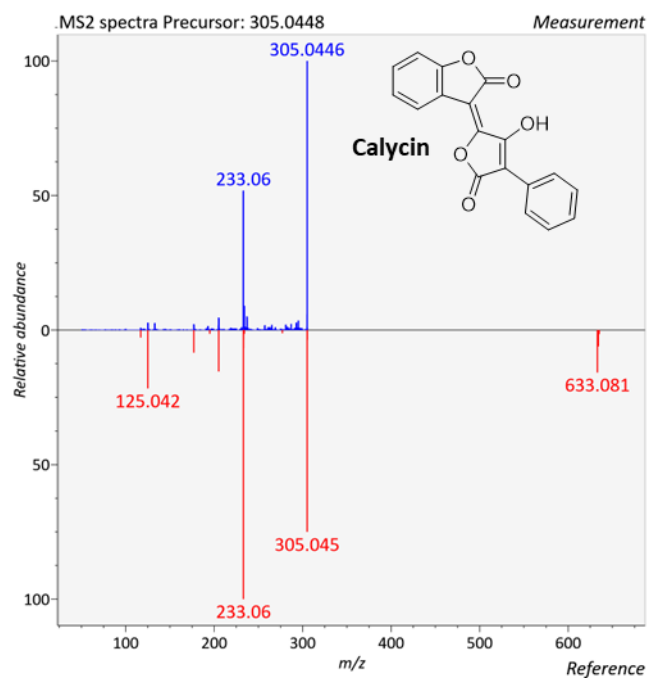

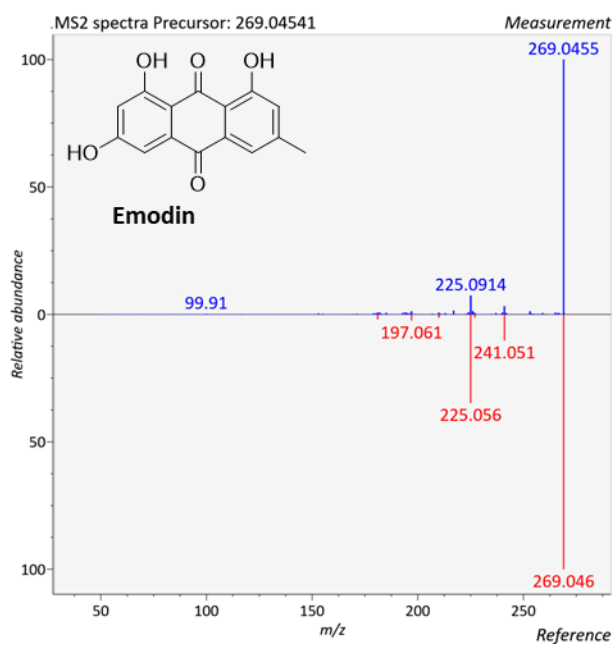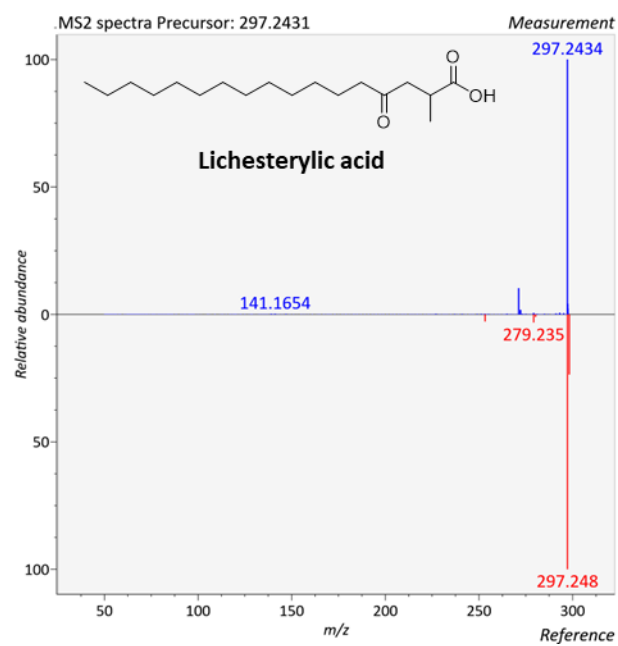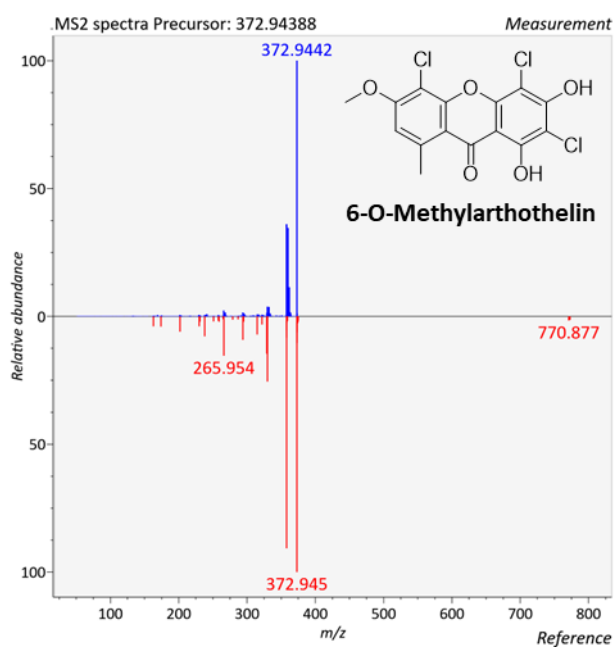

Experimental spectra (ES+) reported in comparison with matched reference spectra.

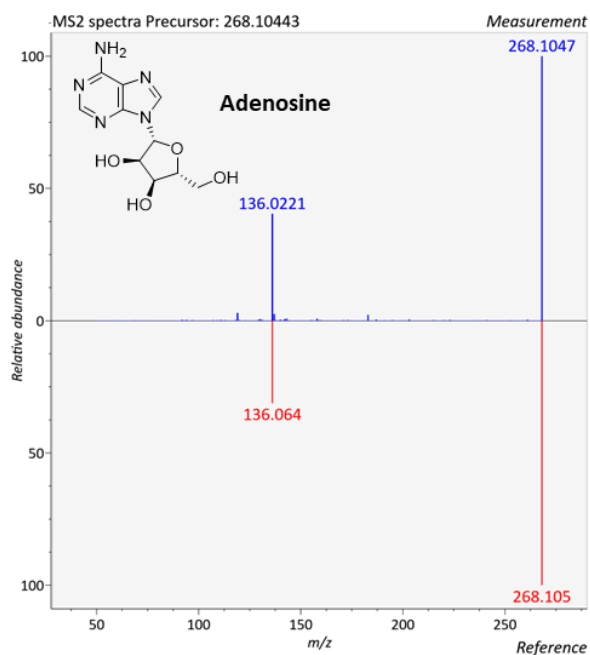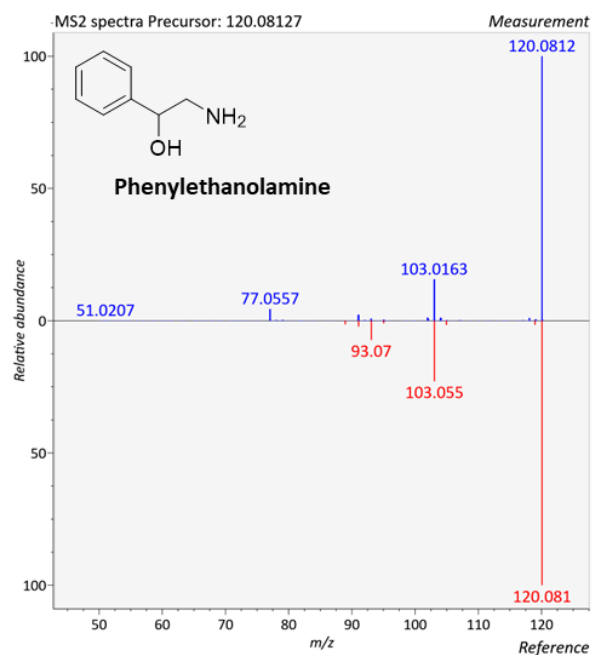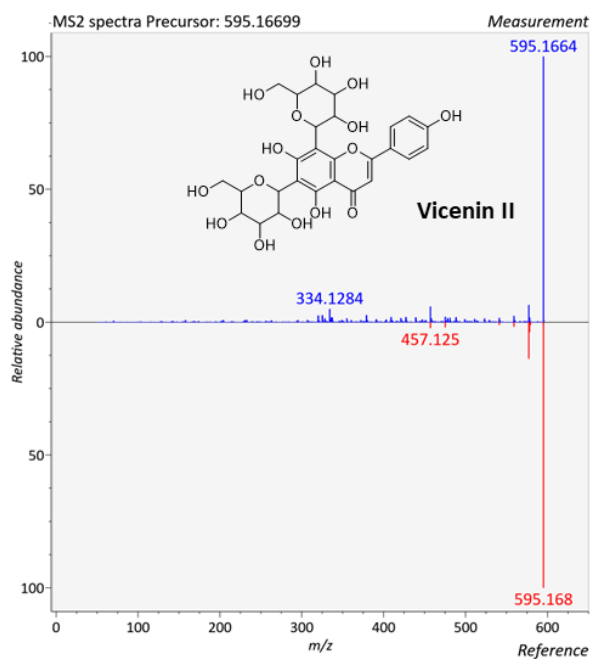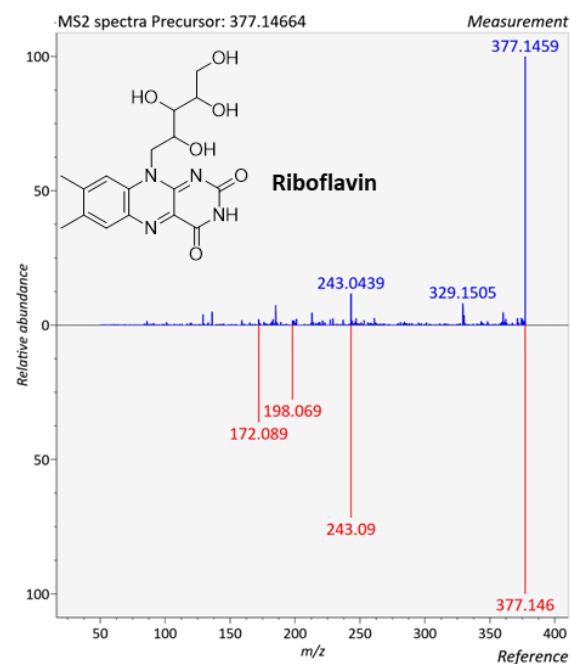

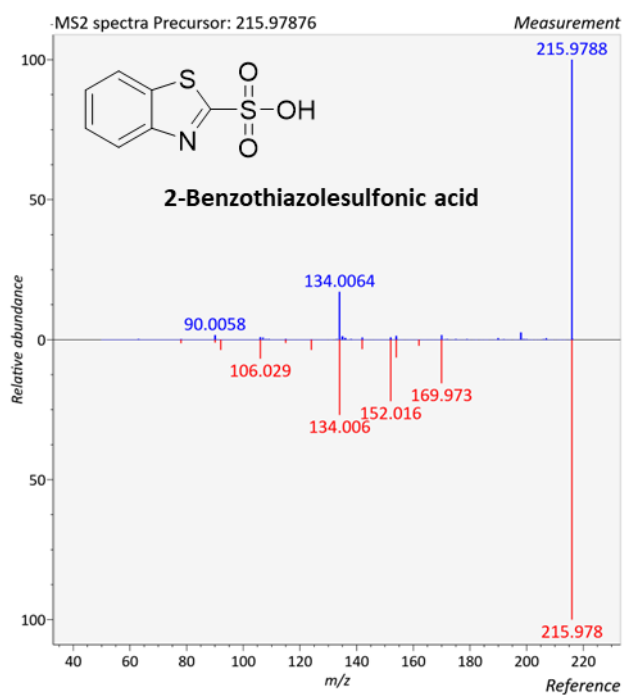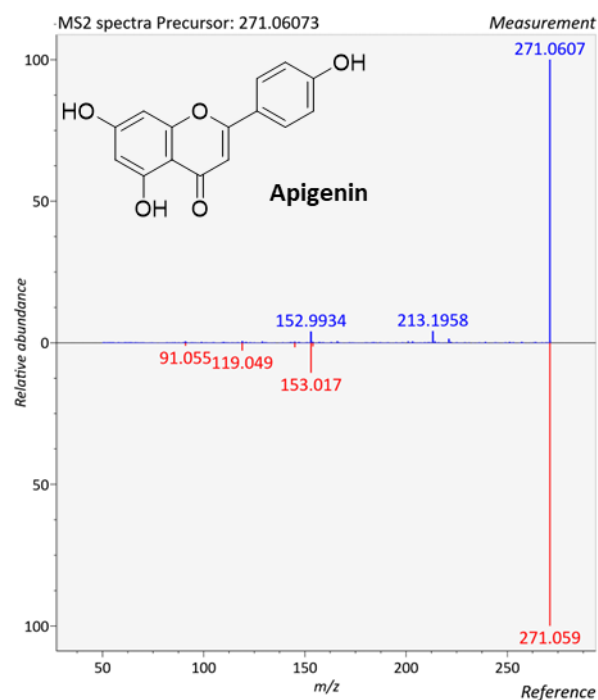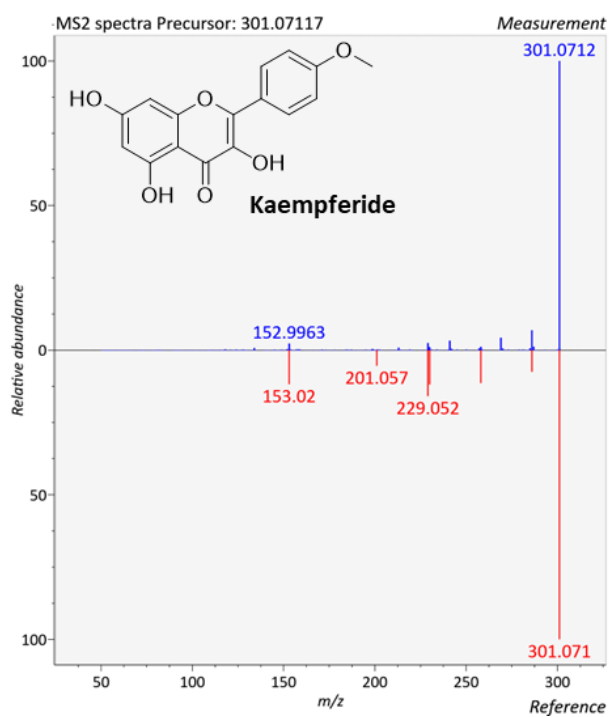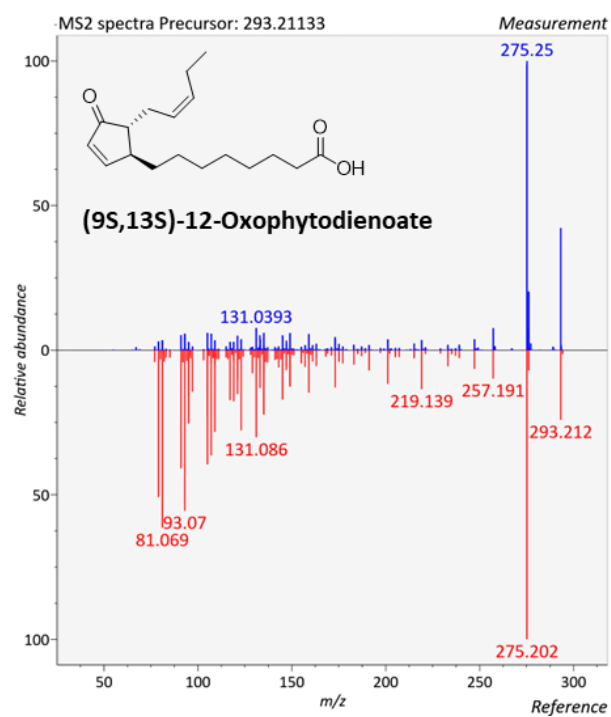



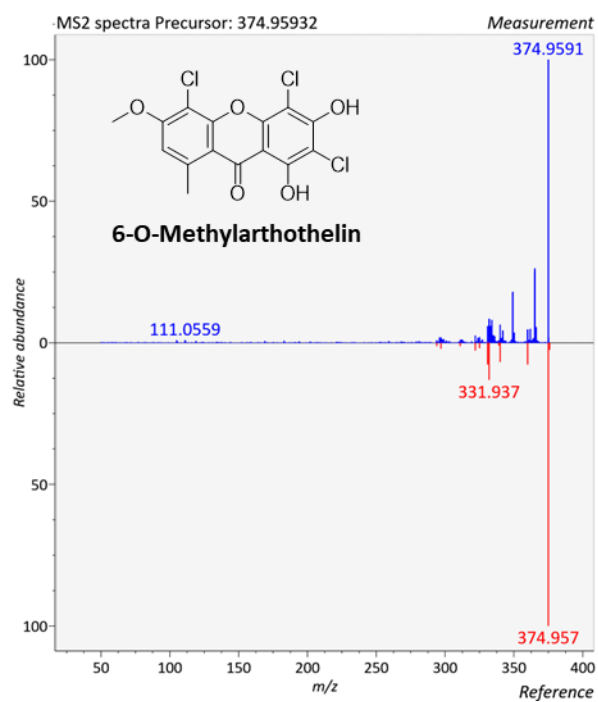

Supplement: s1 [file s1]
